# Supplementary material
Source: PubMed Central journal article supplement (PMC6223302)
Supplement: NIHMS978001-supplement-Supplemental_Figures.pdf [file NIHMS978001-supplement-Supplemental_Figures.pdf]

## Supplemental 1

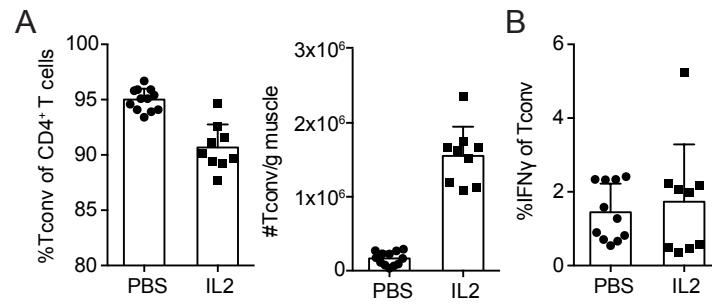

**Supplemental 1 - Splenic Tconv following IL-2c treatment.** (A) Frequency and absolute number of Tconv following IL2 treatment. (B) Frequency of IFN $\gamma$  expressing Tconv following IL2 treatment (right). Results are cumulative of  $\geq 2$  independent experiments of  $n \geq 4$ /group/experiment; error bars represent SD. \* $p < 0.5$ , \*\* $p < 0.01$ , \*\*\* $p < 0.001$ , \*\*\*\* $p < 0.0001$ , Mann-Whitney U test (left, right), Student t test (middle).

## Supplemental 2

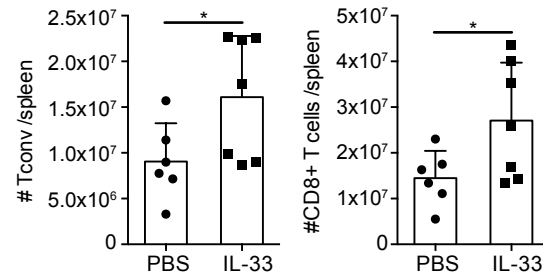

**Supplemental 2 - Splenic T cells following IL-33 treatment.** Absolute number of Tconv and CD8+ T cells in the spleen following IL-33 treatment. Results are cumulative of n = 2 independent experiments of n = 3-4/group/experiment; error bars represent SD. \*p < 0.5, Student's *t* test.

### Supplemental 3

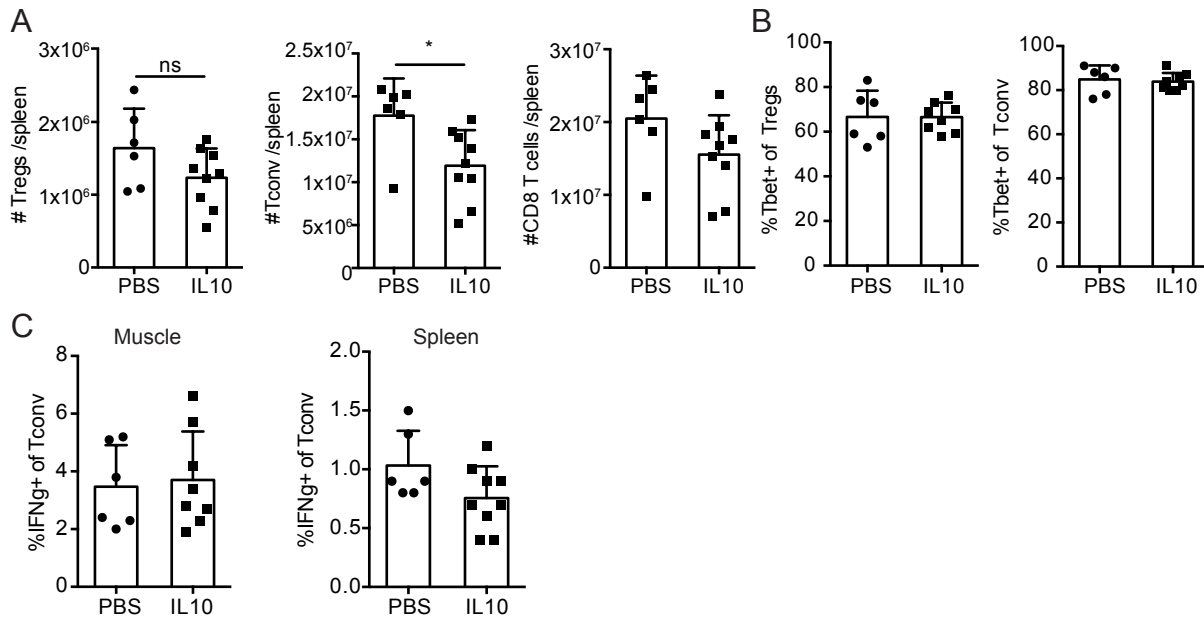

**Supplemental 3 - Splenic T cells following IL10 treatment.** (A) Absolute number of Tregs, Tconv, and CD8+ T cells in the spleen following IL10 treatment. (B) Tbet and IFN $\gamma$  expression of splenic Tregs and Tconv after IL10 treatment. (C) IFN $\gamma$  expression of skeletal muscle and splenic Tconv after IL10 treatment. Results are cumulative of  $n = 3$  independent experiments of  $n = 2-5/\text{group}/\text{experiment}$ ; error bars represent SD. \* $p < 0.5$ , Mann-Whitney U test (B, C), Student's  $t$  test (A).
